# Supplementary material for: Pre-Clinical Evaluation of the Antiviral Activity of Epigalocatechin-3-Gallate, a Component of Green Tea, against Influenza A(H1N1)pdm Viruses
Source: MDPI journal article supplement (doi:10.3390/v15122447), 2023-12-16
Supplement: s1 [file s1]

## Supplementary Information

**Supplementary Table S1.** Ferret sera biochemistry at day 0, 4, and 14 post treatment onset of EGCG treatment for 5 days (d0-d4) with 125 mg/kg twice daily compared to reference ranges from Hein et al. [41].

| Day                   | 0       |     |     |      |     |     | 4       |     |     |      |     |     | 14      |     |     |      |     |     | Ref.       |
|-----------------------|---------|-----|-----|------|-----|-----|---------|-----|-----|------|-----|-----|---------|-----|-----|------|-----|-----|------------|
| Treatment             | Placebo |     |     | EGCG |     |     | Placebo |     |     | EGCG |     |     | Placebo |     |     | EGCG |     |     | Range      |
| Ferret                | 1       | 2   | 3   | 4    | 5   | 6   | 1       | 2   | 3   | 4    | 5   | 6   | 1       | 2   | 3   | 4    | 5   | 6   |            |
| Enzymes (IU/L)        |         |     |     |      |     |     |         |     |     |      |     |     |         |     |     |      |     |     |            |
| ALT                   | 228     | 85  | 18  | 43   | 33  | 16  | 23      | 82  | 26  | 53   | 23  | 13  | 24      | 69  | 22  | 37   | 25  | 106 | 49.0–242.8 |
|                       |         |     | 3   | 1    | 3   | 7   | 6       |     | 1   | 4    | 9   | 2   | 4       |     | 1   | 8    | 1   |     |            |
| AST                   | 168     | 13  | 12  | 13   | 19  | 12  | 15      | 11  | 12  | 17   | 10  | 11  | 85      | 58  | 78  | 11   | 81  | 79  | 40.1–142.7 |
|                       |         | 7   | 0   | 3    | 1   | 0   | 0       | 4   | 4   | 1    | 8   | 6   |         |     |     | 0    |     |     |            |
| ALP                   | 10      | 8   | 35  | 52   | und | 52  | 29      | 21  | 39  | 69   | 30  | 25  | 29      | 23  | 37  | 70   | 33  | 28  | 13.3–141.6 |
| GGT                   | 1       | 1   | 5   | 4    | 1   | 1   | 2       | 1   | 4   | 4    | 2   | 1   | 1       | 1   | 1   | 4    | 3   | 1   | 0.2–14.0   |
| Amylase               | 34      | und | 43  | 35   | 38  | 31  | 39      | 25  | 29  | 42   | 37  | 29  | 29      | 22  | 40  | 38   | 34  | 34  | 19.4–61.9  |
| Lipase                | 58      | 54  | 48  | 39   | 74  | 34  | 30      | 33  | 32  | 33   | 40  | 30  | 30      | 41  | 34  | 32   | 37  | 32  | 73.2–351.1 |
| CK                    | 446     | 25  | 32  | 21   | 47  | 32  | 41      | 24  | 27  | 29   | 25  | 26  | 15      | 11  | 23  | 22   | 20  | 250 | 94.0–730.9 |
|                       |         | 2   | 4   | 1    | 2   | 1   | 7       | 4   | 6   | 5    | 0   | 1   | 1       | 4   | 2   | 9    | 1   |     |            |
| Substrates            |         |     |     |      |     |     |         |     |     |      |     |     |         |     |     |      |     |     |            |
| Bilirubin<br>(μM/L)   | <1      | <1  | <1  | <1   | <1  | <1  | <1      | <1  | <1  | <1   | <1  | 1   | 1       | 1   | 1   | 1    | 1   | 1   | 0.0–3.3    |
| Albumin<br>(g/L)      | 33      | 34  | 33  | 32   | 38  | 31  | 29      | 33  | 33  | 32   | 30  | 34  | 27      | 30  | 29  | 33   | 29  | 33  | 28.0–43.9  |
| Protein<br>(g/L)      | 77      | 63  | 60  | 63   | 76  | 58  | 64      | 63  | 58  | 64   | 60  | 63  | 58      | 57  | 53  | 62   | 56  | 59  | 54.7–77.9  |
| Cholesterol<br>(mM/L) | 5       | 5.7 | 8.7 | 8    | 4.5 | 5   | 5.2     | 5   | 6.1 | 9.3  | 4.9 | 5.1 | 5.8     | 4.9 | 9.5 | 8.8  | 3.8 | 5.4 | 2.4–7.1    |
| Triglycerides (mM/L)  | 0.7     | 0.8 | 1.1 | 1    | 0.5 | 1.1 | 0.5     | 0.5 | 0.5 | 1    | 0.5 | 0.8 | 0.4     | 0.7 | 0.8 | 1.1  | 0.3 | 0.4 | 0.5–2.8    |

|                             |     |     |     |     |     |     |     |     |     |     |     |     |     |     |     |     |     |     |             |
|-----------------------------|-----|-----|-----|-----|-----|-----|-----|-----|-----|-----|-----|-----|-----|-----|-----|-----|-----|-----|-------------|
| <b>Glucose</b><br>(mM/L)    | 4.2 | 3.6 | 4.2 | 3.4 | 4.1 | 3.7 | 5.7 | 5.2 | 7   | 4.9 | 5.4 | 8.1 | 6.4 | 5.5 | 7   | 5.6 | 6.4 | 7.2 | 3.0–8.5     |
| <b>Urea (mM/L)</b>          | 10  | 11  | 12  | 12  | 10  | 11  | 9   | 10  | 10  | 13  | 12  | 6   | 9   | 12  | 10  | 14  | 11  | 7   | 4.8–16.9    |
| <b>Creatinine</b><br>(μM/L) | 54  | 59  | 56  | 55  | 58  | 51  | 37  | 45  | 39  | 43  | 57  | 19  | 47  | 50  | 34  | 32  | 43  | 34  | 23.0–76.7   |
| <b>Electrolytes (mM/L)</b>  |     |     |     |     |     |     |     |     |     |     |     |     |     |     |     |     |     |     |             |
| <b>Sodium</b>               | 150 | 151 | 152 | 151 | 147 | 148 | 148 | 149 | 151 | 149 | 149 | 147 | 148 | 152 | 151 | 149 | 149 | 150 | 140.1–169.7 |
| <b>Potassium</b>            | 5.1 | 5.5 | 4.8 | 5.3 | 5.6 | 5   | 4.8 | 5.2 | 4.8 | 5   | 5.2 | 5   | 5.4 | 5.7 | 4.8 | 4.9 | 5.5 | 5   | 1.0–3.1     |
| <b>Chloride</b>             | 119 | 119 | 116 | 117 | 114 | 121 | 118 | 120 | 116 | 116 | 115 | 114 | 118 | 121 | 116 | 119 | 118 | 118 | 108.0–119.9 |
| <b>Calcium</b>              | 1.9 | 2.0 | 2.1 | 2.1 | 2.0 | 2.1 | 2.1 | 2.1 | 2.2 | 2.2 | 2.2 | 2.1 | 2.0 | 2.1 | 2.2 | 2.2 | 2.1 | 2.2 | 2.0–2.6     |
| <b>Phosphate</b>            | 1.7 | 1.8 | 2.0 | 1.9 | 2.1 | 1.9 | 1.6 | 1.6 | 2.3 | 2.0 | 2.0 | 1.8 | 1.9 | 2.2 | 2.3 | 2.5 | 2.2 | 1.7 | 1.0–3.1     |
| <b>Magnesium</b>            | 1.0 | 1.0 | 0.9 | 0.9 | 1.0 | 0.9 | 1.0 | 1.0 | 0.9 | 1.0 | 1.0 | 1.0 | 0.9 | 1.0 | 0.9 | 0.9 | 0.9 | 0.9 | 0.9–1.6     |

ALT, Alanine transaminase; AST, Aspartate transaminase; ALP, Alkaline phosphatase; GGT, Gamma-glutamyl transferase; CK, Creatine kinase.

**Supplementary Table S2. Ferret nasal wash and tissue virus genome pyrosequencing resulting proportion of NA-H275Y oseltamivir resistance mutation.**

| <b>Treatment</b> | <b>Ferret</b> | <b>Nasal wash<br/>D4</b> | <b>Lung<br/>left cranial</b> | <b>Lung right<br/>cranial</b> | <b>Soft<br/>palate</b> | <b>Nasal<br/>turbinate</b> |
|------------------|---------------|--------------------------|------------------------------|-------------------------------|------------------------|----------------------------|
| <b>Placebo</b>   | <b>1</b>      | <5%                      | <5%                          | 5.8%                          | <5%                    | <5%                        |
|                  | <b>2</b>      | <5%                      | <5%                          | <5%                           | <5%                    | <5%                        |
|                  | <b>3</b>      | <5%                      | <5%                          | <5%                           | <5%                    | <5%                        |
|                  | <b>4</b>      | <5%                      | <5%                          | <5%                           | <5%                    | <5%                        |
| <b>EGCG</b>      | <b>5</b>      | <5%                      | Undetected                   | Undetected                    | <5%                    | <5%                        |
|                  | <b>6</b>      | <5%                      | <5%                          | <5%                           | <5%                    | <5%                        |

|               |    |     |            |            |            |     |
|---------------|----|-----|------------|------------|------------|-----|
|               | 7  | <5% | Undetected | <5%        | Undetected | <5% |
|               | 8  | <5% | <5%        | <5%        | <5%        | <5% |
| OST           | 9  | <5% | Undetected | Undetected | <5%        | <5% |
|               | 10 | <5% | <5%        | <5%        | Undetected | <5% |
|               | 11 | <5% | <5%        | <5%        | 8.4%       | <5% |
|               | 12 | <5% | <5%        | Undetected | <5%        | <5% |
| EGCG<br>+ OST | 13 | <5% | <5%        | Undetected | <5%        | <5% |
|               | 14 | <5% | <5%        | Undetected | <5%        | <5% |
|               | 15 | <5% | Undetected | Undetected | 5.2%       | <5% |
|               | 16 | <5% | <5%        | 6.7%       | <5%        | <5% |
